# Supplementary material
Source: publisher site journal article supplement (http://www.kjim.org/upload/media/kjim-2023-357-Supplementary-Fig-5.pdf)
Supplement: Supplementary file 1 [file kjim-2023-357-Supplementary-Fig-5.pdf]

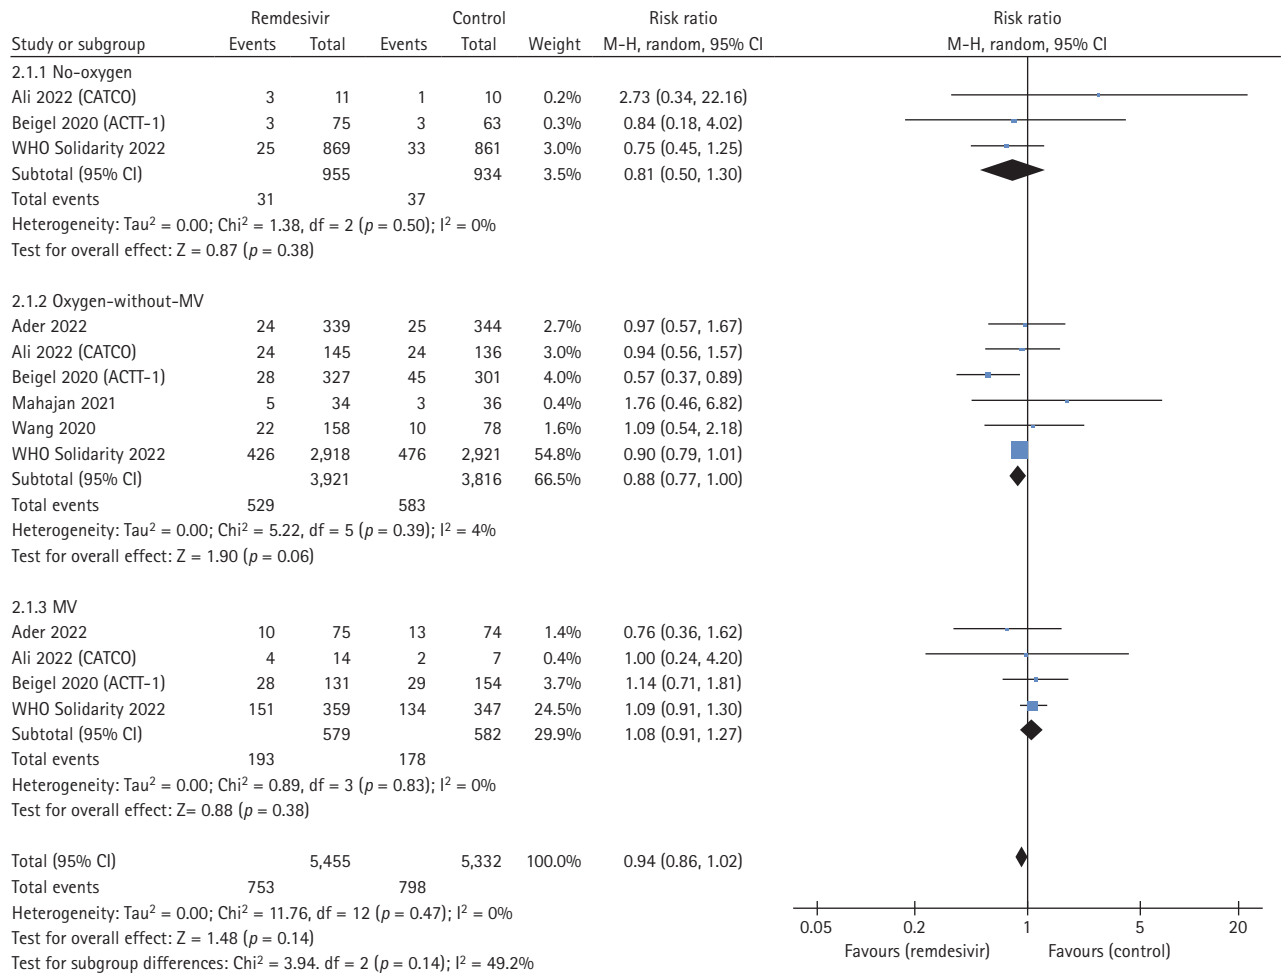

**A**

**Supplementary Figure 5.** Forest plot of sensssitivity analysis results. (A) Forest plot of all-cause mortality. (B) Forest plot of new need for mechanical ventilation. (C) Forest plot of clinical improvement. (D) Forest plot of serious adverse events. (E) Forest plot of discharge.

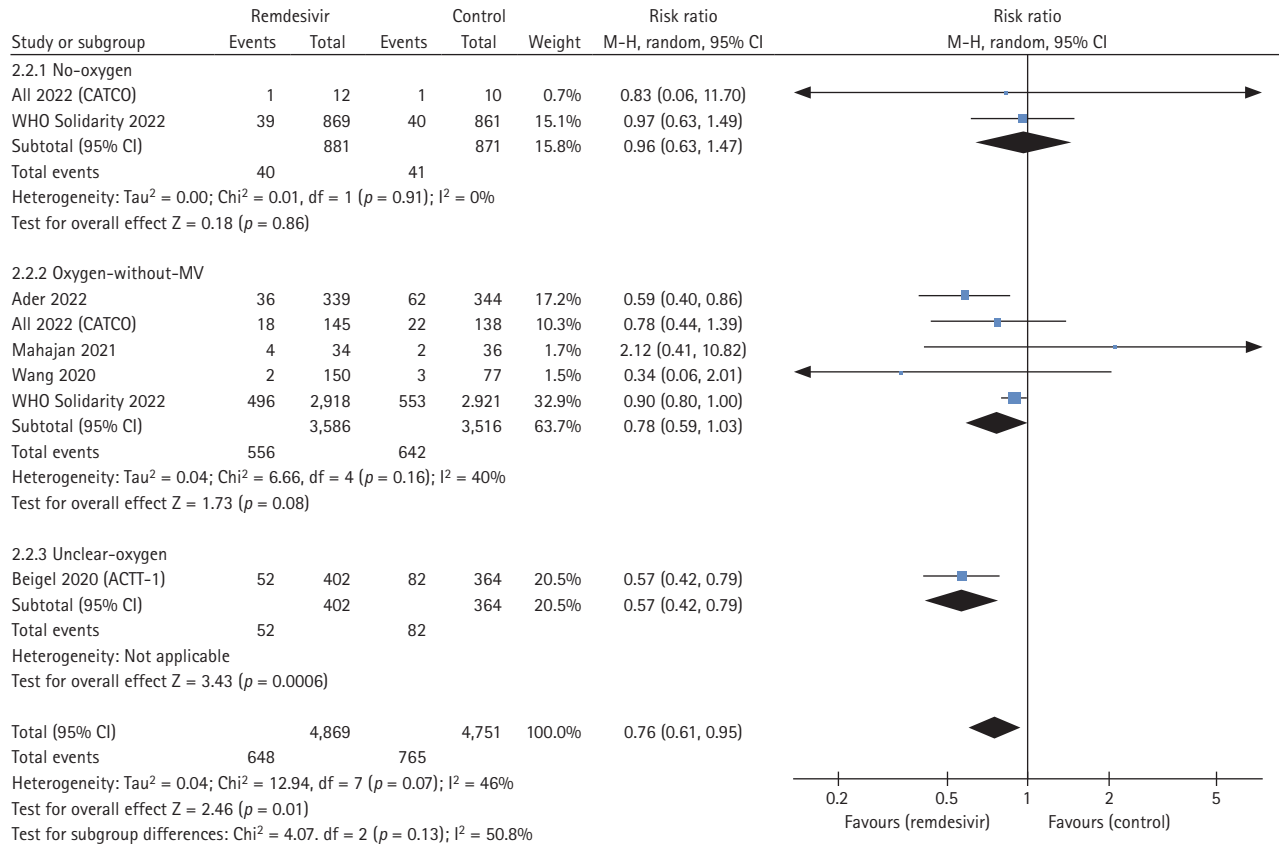

**B**

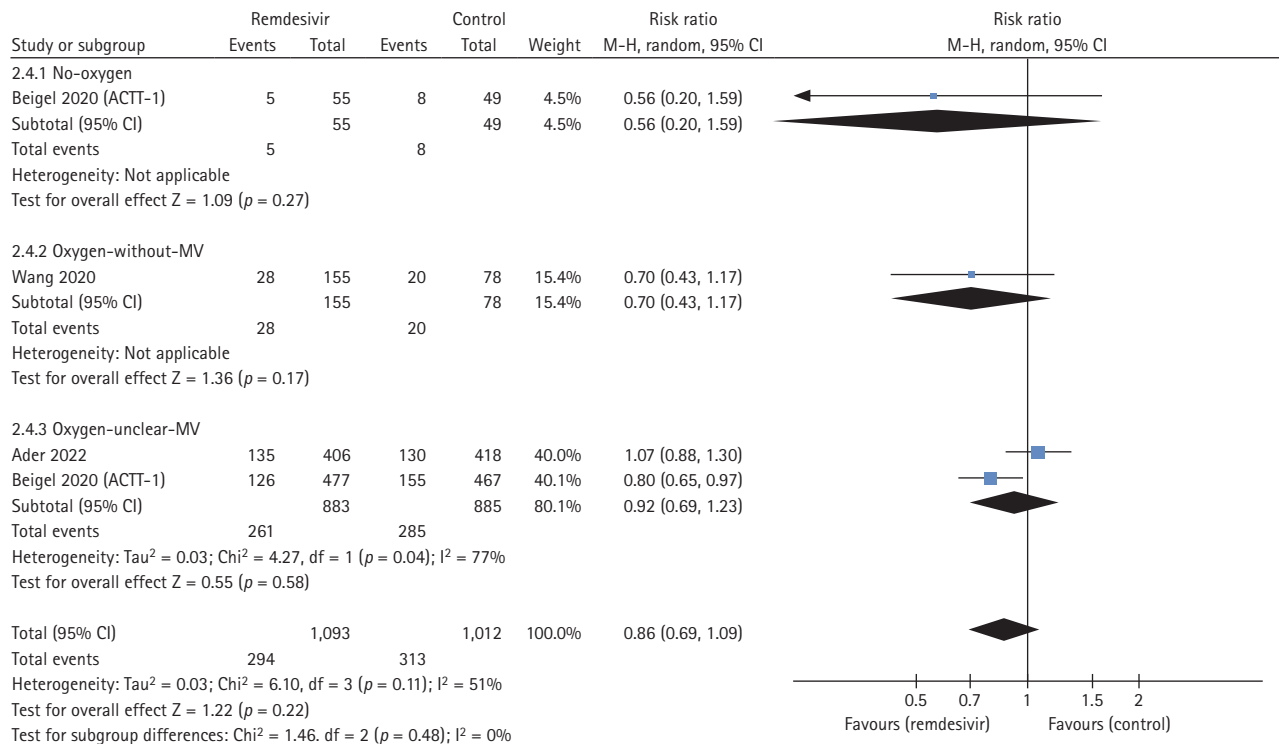

**C**

Supplementary Figure 5. Continued

**D**

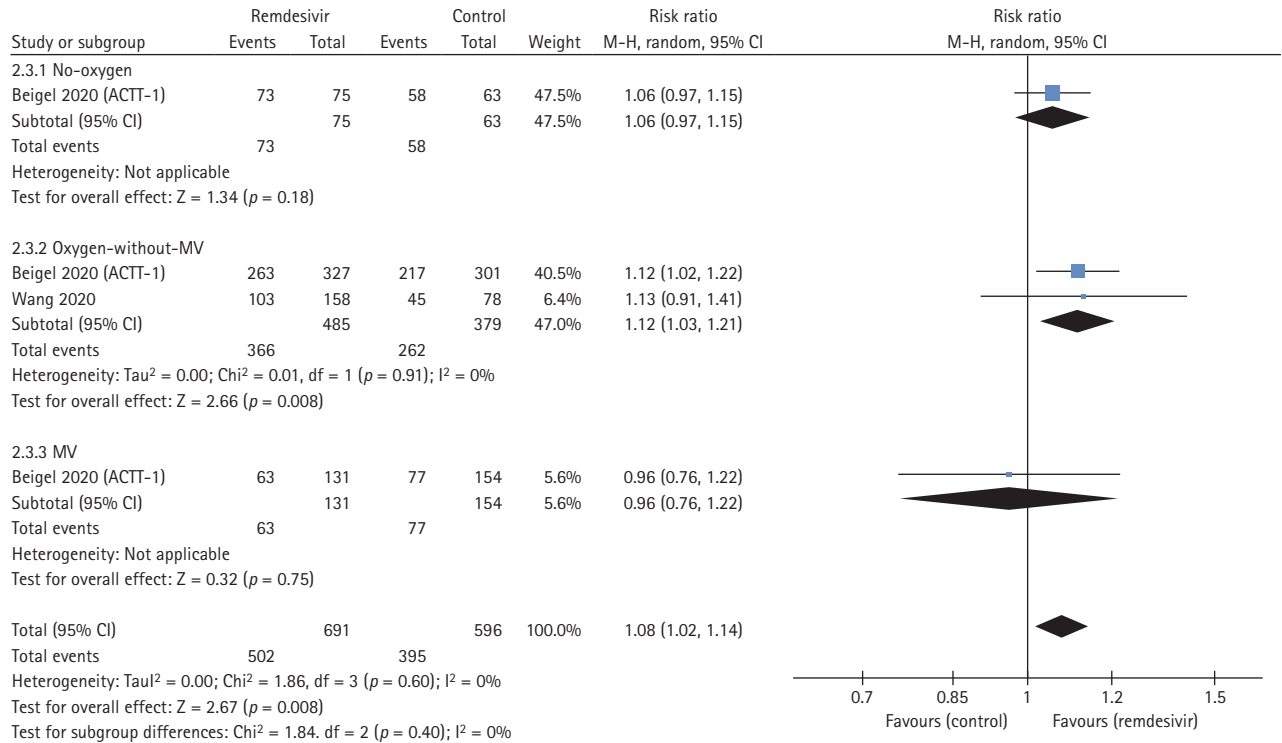

**E**

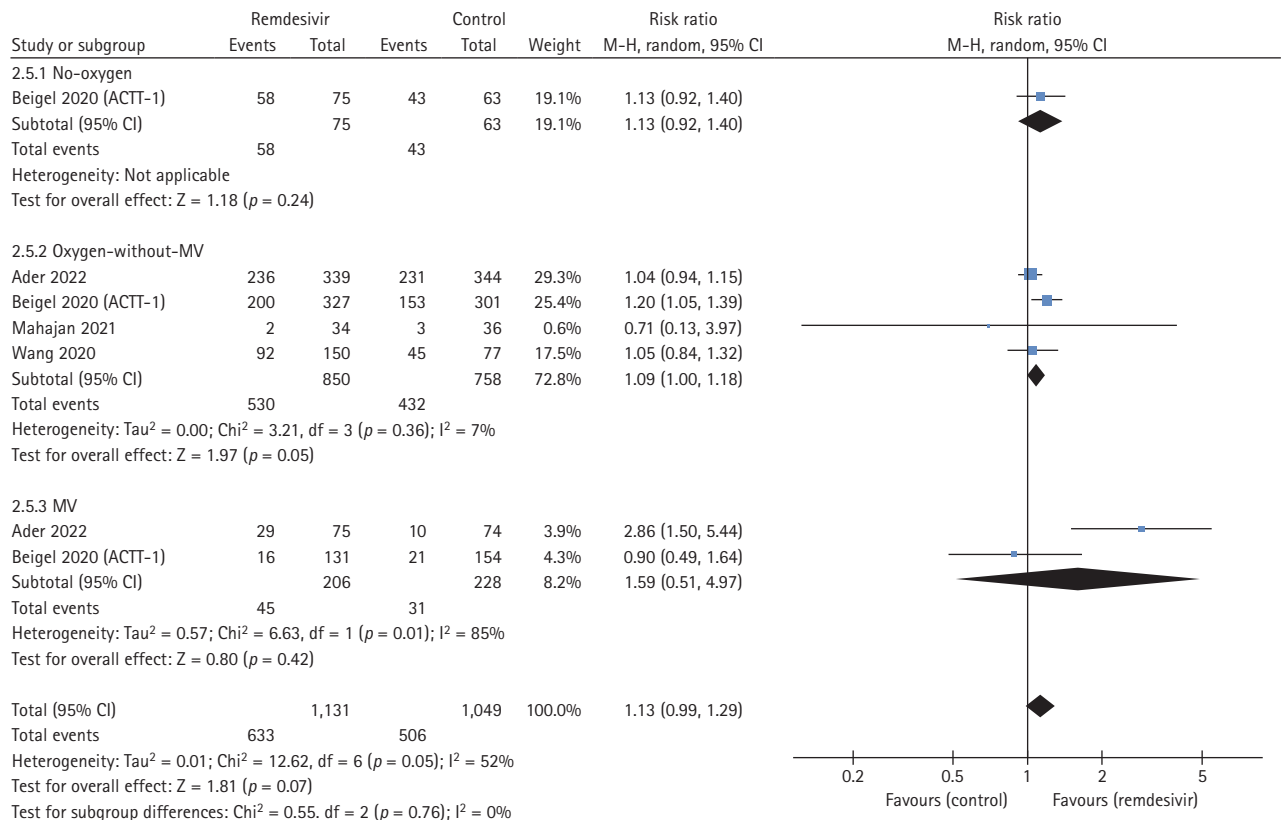

Supplementary Figure 5. Continued
